# Supplementary material for: Associations of SARS-CoV-2 serum IgG with occupation and demographics of military personnel
Source: bioRxiv or medRxiv preprint supplement (doi:10.1101/2021.04.21.21255881), 2021-04-23
Supplement: Supplementary file [file media-1.pdf]

Supplemental Materials for:

Associations of SARS-CoV-2 serum IgG with occupation and demographics of military personnel

Joseph Zell<sup>1</sup>, Jon Klein<sup>2</sup>, Carolina Lucas<sup>2</sup>, Martin Slade<sup>1</sup>, Jian Liu<sup>1</sup>, Akiko Iwasaki<sup>2,3</sup>, Adam V  
Wisnewski<sup>\*1</sup>, Carrie A Redlich<sup>1</sup>

<sup>1</sup>Department of Internal Medicine, Yale University School of Medicine, New Haven, CT, USA

<sup>2</sup>Department of Immunobiology, Yale University School of Medicine, New Haven, CT, USA

<sup>3</sup>Howard Hughes Medical Institute, Chevy Chase, MD, USA

| Item                                                                                                                 | Page # |
|----------------------------------------------------------------------------------------------------------------------|--------|
| Fig. S1. Age distribution of study subjects vs. the local population.                                                | 2      |
| Table S1. Parsimonious adjusted logistic regression model of demographic/occupational data and SARS-CoV-2 serum IgG. | 3      |
| Table S2. Unadjusted linear regression model of demographic/occupational data and SARS-CoV-2 serum IgG.              | 4      |
| Table S3. Parsimonious adjusted linear regression model of demographic/occupational data and SARS-CoV-2 serum IgG.   | 5      |
| Figure S2. Spike antigen-specific IgG in serum from subjects from MOS groups with < 7 subjects/MOS code.             | 6      |

### Study Population vs Working CT Population

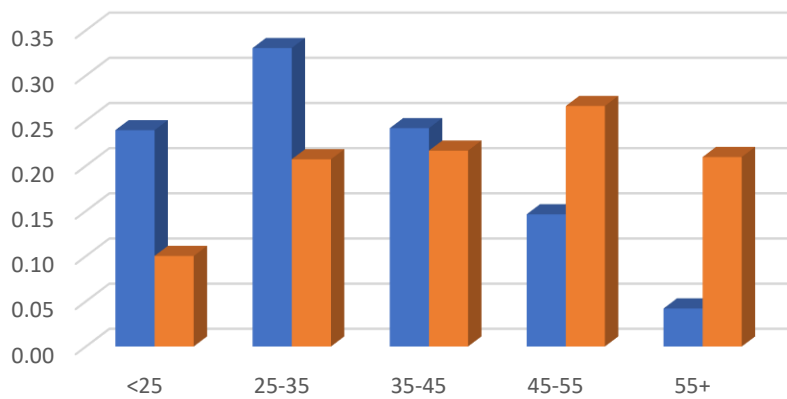

Figure S1. Age distribution of study subjects vs. the local population. The % of workers (Y-axis) in different age ranges (X-axis) are depicted. Study subjects (blue bars) data from present study and local population (orange bars) estimates are from <https://statisticalatlas.com/state/Connecticut/Employment-Status#figure/employment-status-by-age>.

Table S1. Parsimonious (adjusted) logistic regression model of demographic/occupational data and SARS-CoV-2 serum IgG.

| Parameter           | Level           | n    | Spike IgG +/-                                     |                |               |       |        |             |                       |             |                       |
|---------------------|-----------------|------|---------------------------------------------------|----------------|---------------|-------|--------|-------------|-----------------------|-------------|-----------------------|
|                     |                 |      | Parsimonious (Adjusted) Logistic Regression Model |                |               |       |        |             |                       |             |                       |
|                     |                 |      | Estimate                                          | Standard Error | Odds Ratio    |       |        | Wald Square | Chi-<br>Pr > $\chi^2$ | Wald Square | Chi-<br>Pr > $\chi^2$ |
| Estimate            | L95%            | U95% |                                                   |                |               |       |        |             |                       |             |                       |
| Race                | Asian           | 25   | 0.0921                                            | 0.5774         | 1.398         | 0.403 | 4.850  | 0.0255      | 0.8732                | 13.8046     | 0.0169                |
|                     | Black           | 77   | 0.5194                                            | 0.3726         | 2.143         | 1.117 | 4.111  | 1.9426      | 0.1634                |             |                       |
|                     | Mixed           | 39   | -1.4732                                           | 0.8736         | 0.292         | 0.039 | 2.173  | 2.8437      | 0.0917                |             |                       |
|                     | Other           | 7    | 0.5437                                            | 0.9261         | 2.196         | 0.259 | 18.624 | 0.3446      | 0.5572                |             |                       |
|                     | Unknown         | 120  | 0.5610                                            | 0.3411         | 2.234         | 1.293 | 3.862  | 2.7048      | 0.1000                |             |                       |
|                     | White           | 720  | 0 (Reference)                                     | -              | 1 (Reference) | -     | -      | -           | -                     |             |                       |
| Hispanic            | Hispanic        | 171  |                                                   |                |               |       |        |             |                       |             |                       |
|                     | Not Hispanic    | 817  | 0 (Reference)                                     | -              | 1 (Reference) | -     | -      | -           | -                     |             |                       |
| Exposed COVID       | Yes             | 136  | 0.3525                                            | 0.1323         | 2.024         | 1.205 | 3.399  | 7.1016      | 0.0077                | 7.1016      | 0.0077                |
|                     | Maybe/No        | 852  | 0 (Reference)                                     | -              | 1 (Reference) | -     | -      | -           | -                     |             |                       |
| Number in Household | 6 or more       | 67   | 0.4118                                            | 0.1643         | 2.279         | 1.197 | 4.339  | 6.2812      | 0.0122                | 6.2812      | 0.0122                |
|                     | Less than 6     | 921  | 0 (Reference)                                     | -              | 1 (Reference) | -     | -      | -           | -                     |             |                       |
| Age [years]         | per year        | 988  |                                                   |                |               |       |        |             |                       |             |                       |
|                     | Current         | 77   |                                                   |                |               |       |        |             |                       |             |                       |
| Smoking Category    | Previous        | 279  |                                                   |                |               |       |        |             |                       |             |                       |
|                     | Never           | 631  | 0 (Reference)                                     | -              | 1 (Reference) | -     | -      | -           | -                     |             |                       |
|                     | Current         | 66   |                                                   |                |               |       |        |             |                       |             |                       |
| Vaping Category     | Previous        | 88   |                                                   |                |               |       |        |             |                       |             |                       |
|                     | Never           | 834  | 0 (Reference)                                     | -              | 1 (Reference) | -     | -      | -           | -                     |             |                       |
|                     | Yes - every day | 29   |                                                   |                |               |       |        |             |                       |             |                       |
| Alcohol             | Yes - weekly    | 289  |                                                   |                |               |       |        |             |                       |             |                       |
|                     | Yes - monthly   | 398  |                                                   |                |               |       |        |             |                       |             |                       |
|                     | No              | 272  | 0 (Reference)                                     | -              | 1 (Reference) | -     | -      | -           | -                     |             |                       |
|                     | Female          | 200  |                                                   |                |               |       |        |             |                       |             |                       |
| Sex                 | Male            | 788  | 0 (Reference)                                     | -              | 1 (Reference) | -     | -      | -           | -                     |             |                       |
|                     | Air Force       | 154  |                                                   |                |               |       |        |             |                       |             |                       |
| Branch              | Unknown         | 96   |                                                   |                |               |       |        |             |                       |             |                       |
|                     | Army            | 738  | 0.0000                                            |                | 1 (Reference) |       |        |             |                       |             |                       |
| MOS                 | 21              | 7    | 0.3614                                            | 0.6292         | 4.095         | 0.759 | 22.102 | 0.3299      | 0.5657                | 7.3189      | 0.0257                |
|                     | 92F             | 7    | 0.6871                                            | 0.6016         | 5.672         | 1.185 | 27.142 | 1.3043      | 0.2534                |             |                       |
|                     | All Other       | 974  | 0 (Reference)                                     | -              | 1 (Reference) | -     | -      | -           | -                     |             |                       |

Table S2. Unadjusted linear regression model of demographic/occupational data and SARS-CoV-2 serum IgG.

| Parameter           | Level           | n   | Spike IgG ELISA OD                  |                |                       |         |         |         |         |         |        |
|---------------------|-----------------|-----|-------------------------------------|----------------|-----------------------|---------|---------|---------|---------|---------|--------|
|                     |                 |     | Unadjusted Linear Regression Models |                |                       |         |         |         |         |         |        |
|                     |                 |     | Estimate                            | Standard Error | e <sup>estimate</sup> | L95%    | U95%    | t Value | Pr >  t | F Value | Pr > F |
| Race                | Asian           | 25  | 0.0995                              | 0.1740         | 1.1047                | -0.2419 | 0.4410  | 0.57    | 0.5674  | 4.98    | 0.0002 |
|                     | Black           | 77  | 0.3382                              | 0.1002         | 1.4025                | -0.1416 | 0.5349  | 3.37    | 0.0008  |         |        |
|                     | Mixed           | 39  | -0.0462                             | 0.1406         | 0.9549                | -0.3221 | 0.2298  | -0.33   | 0.7427  |         |        |
|                     | Other           | 7   | 0.0838                              | 0.3249         | 1.0874                | -0.5537 | 0.7213  | 0.26    | 0.7964  |         |        |
|                     | Unknown         | 120 | 0.3331                              | 0.0843         | 1.3953                | 0.1677  | 0.4986  | 3.95    | <0.0001 |         |        |
|                     | White           | 720 | 0 (Reference)                       | -              | 1 (Reference)         | -       | -       | -       | -       |         |        |
| Hispanic            | Hispanic        | 171 | 0.1949                              | 0.0724         | 1.2151                | 0.0528  | 0.3688  | 2.69    | 0.0072  | 7.25    | 0.0072 |
|                     | Not Hispanic    | 817 | 0 (Reference)                       | -              | 1 (Reference)         | -       | -       | -       | -       |         |        |
| Exposed COVID       | Yes             | 136 | 0.1942                              | 0.0797         | 1.2143                | 0.0377  | 0.3506  | 2.44    | 0.0150  | 5.93    | 0.0150 |
|                     | Maybe/No        | 852 | 0 (Reference)                       | -              | 1 (Reference)         | -       | -       | -       | -       |         |        |
| Number in Household | 6 or more       | 67  | 0.2695                              | 0.1092         | 1.3093                | 0.0552  | 0.4839  | 2.47    | 0.0138  | 6.09    | 0.0138 |
|                     | Less than 6     | 921 | 0 (Reference)                       | -              | 1 (Reference)         | -       | -       | -       | -       |         |        |
| Age [years]         | per year        | 988 | 0.0050                              | 0.0026         | 1.0050                | 0.0000  | 0.0101  | 1.95    | 0.0510  | 3.82    | 0.0510 |
| Smoking Category    | Current         | 77  | 0.0409                              | 0.1046         | 1.0418                | -0.1643 | 0.2461  | 0.39    | 0.6956  | 0.74    | 0.4774 |
|                     | Previous        | 279 | -0.0660                             | 0.0622         | 0.9362                | -0.1880 | 0.0561  | -1.06   | 0.2890  |         |        |
|                     | Never           | 631 | 0 (Reference)                       | -              | 1 (Reference)         | -       | -       | -       | -       |         |        |
| Vaping Category     | Current         | 66  | 0.0684                              | 0.1107         | 1.0708                | -0.1489 | 0.2857  | 0.62    | 0.5369  | 0.58    | 0.5584 |
|                     | Previous        | 88  | 0.0907                              | 0.0970         | 1.0949                | -0.0998 | 0.2811  | 0.93    | 0.3504  |         |        |
|                     | Never           | 834 | 0 (Reference)                       | -              | 1 (Reference)         | -       | -       | -       | -       |         |        |
| Alcohol             | Yes - every day | 29  | -0.0667                             | 0.1691         | 0.9355                | -0.3985 | 0.2651  | -0.39   | 0.6933  | 0.85    | 0.4686 |
|                     | Yes - weekly    | 289 | -0.0946                             | 0.0730         | 0.9097                | -0.2379 | 0.0486  | -1.30   | 0.1953  |         |        |
|                     | Yes - monthly   | 398 | 0.0022                              | 0.0680         | 1.0022                | -0.1312 | 0.1356  | 0.03    | 0.9741  |         |        |
|                     | No              | 272 | 0 (Reference)                       | -              | 1 (Reference)         | -       | -       | -       | -       |         |        |
| Sex                 | Female          | 200 | -0.2648                             | 0.0679         | 0.7673                | -0.3980 | -0.1317 | -3.90   | 0.0001  | 15.23   | 0.0001 |
|                     | Male            | 788 | 0 (Reference)                       | -              | 1 (Reference)         | -       | -       | -       | -       |         |        |
| Branch              | Air Force       | 154 | -0.1314                             | 0.0765         | 0.8768                | -0.2815 | 0.0186  | -1.72   | 0.0859  | 1.49    | 0.2264 |
|                     | Unknown         | 96  | -0.0096                             | 0.0928         | 0.9905                | -0.1917 | 0.1726  | -0.10   | 0.9180  |         |        |
|                     | Army            | 738 | 0 (Reference)                       | -              | 1 (Reference)         | -       | -       | -       | -       |         |        |
| MOS                 | 2T              | 7   | 0.9166                              | 0.3259         | 2.5009                | 0.2771  | 1.5562  | 2.81    | 0.0050  | 6.49    | 0.0016 |
|                     | 92F             | 7   | 0.7405                              | 0.3259         | 2.0969                | 0.1009  | 1.3800  | 2.27    | 0.0233  |         |        |
|                     | All Other       | 974 | 0 (Reference)                       | -              | 1 (Reference)         | -       | -       | -       | -       |         |        |

Table S3. Parsimonious (adjusted) linear regression model of demographic/occupational data and SARS-CoV-2 serum IgG.

| Parameter           | Level           | n   | Spike IgG ELISA OD                              |                |                       |       |         |         |         |         |        |
|---------------------|-----------------|-----|-------------------------------------------------|----------------|-----------------------|-------|---------|---------|---------|---------|--------|
|                     |                 |     | Parsimonious (Adjusted) Linear Regression Model |                |                       |       |         |         |         |         |        |
|                     |                 |     | Estimate                                        | Standard Error | e <sup>estimate</sup> | L95%  | U95%    | t Value | Pr >  t | F Value | Pr > F |
| Race                | Asian           | 25  | 0.1530                                          | 0.1710         | 1.1653                | -0.18 | 0.4887  | 0.89    | 0.3713  | 6.32    | <.0001 |
|                     | Black           | 77  | 0.3893                                          | 0.1019         | 1.4760                | 0.19  | 0.5892  | 3.82    | 0.0001  |         |        |
|                     | Mixed           | 39  | 0.0147                                          | 0.1382         | 1.0148                | -0.26 | 0.2859  | 0.11    | 0.9154  |         |        |
|                     | Other           | 7   | 0.1256                                          | 0.3186         | 1.1338                | -0.50 | 0.7508  | 0.39    | 0.6936  |         |        |
|                     | Unknown         | 120 | 0.3808                                          | 0.0837         | 1.4635                | 0.22  | 0.5452  | 4.55    | <.0001  |         |        |
| Hispanic            | White           | 720 | 0 (Reference)                                   | -              | 1 (Reference)         | -     | -       | -       | -       |         |        |
|                     | Hispanic        | 171 |                                                 |                |                       |       |         |         |         |         |        |
| Exposed COVID       | Not Hispanic    | 817 | 0 (Reference)                                   | -              | 1 (Reference)         | -     | -       | -       | -       |         |        |
|                     | Yes             | 136 | 0.2284                                          | 0.0779         | 1.2566                | 0.08  | 0.3813  | 2.93    | 0.0035  | 8.59    | 0.0035 |
| Number in Household | Maybe/No        | 852 | 0 (Reference)                                   | -              | 1 (Reference)         | -     | -       | -       | -       |         |        |
|                     | 6 or more       | 67  | 0.2375                                          | 0.1070         | 1.2681                | 0.03  | 0.4474  | 2.22    | 0.0266  | 4.93    | 0.0266 |
| Age [years]         | Less than 6     | 921 | 0 (Reference)                                   | -              | 1 (Reference)         | -     | -       | -       | -       |         |        |
|                     | per year        | 988 | 0.0076                                          | 0.0026         | 1.0076                | 0.00  | 0.0126  | 2.94    | 0.0034  | 8.64    | 0.0034 |
| Smoking Category    | Current         | 77  |                                                 |                |                       |       |         |         |         |         |        |
|                     | Previous        | 279 |                                                 |                |                       |       |         |         |         |         |        |
|                     | Never           | 631 | 0 (Reference)                                   | -              | 1 (Reference)         | -     | -       | -       | -       |         |        |
| Vaping Category     | Current         | 66  |                                                 |                |                       |       |         |         |         |         |        |
|                     | Previous        | 88  |                                                 |                |                       |       |         |         |         |         |        |
|                     | Never           | 834 | 0 (Reference)                                   | -              | 1 (Reference)         | -     | -       | -       | -       |         |        |
| Alcohol             | Yes - every day | 29  |                                                 |                |                       |       |         |         |         |         |        |
|                     | Yes - weekly    | 289 |                                                 |                |                       |       |         |         |         |         |        |
|                     | Yes - monthly   | 398 |                                                 |                |                       |       |         |         |         |         |        |
|                     | No              | 272 | 0 (Reference)                                   | -              | 1 (Reference)         | -     | -       | -       | -       |         |        |
| Sex                 | Female          | 200 | -0.2849                                         | 0.0671         | 0.7521                | -0.42 | -0.1532 | -4.25   | <.0001  | 18.04   | <.0001 |
|                     | Male            | 788 | 0 (Reference)                                   | -              | 1 (Reference)         | -     | -       | -       | -       |         |        |
| Branch              | Air Force       | 154 |                                                 |                |                       |       |         |         |         |         |        |
|                     | Unknown         | 96  |                                                 |                |                       |       |         |         |         |         |        |
|                     | Army            | 738 | 0.0000                                          |                | 1 (Reference)         |       |         |         |         |         |        |
| MOS                 | Z1              | 7   | 0.9565                                          | 0.3186         | 2.6025                | 0.33  | 1.5817  | 3.00    | 0.0027  | 6.50    | 0.0016 |
|                     | 92F             | 7   | 0.6412                                          | 0.3188         | 1.8988                | 0.02  | 1.2668  | 2.01    | 0.0445  |         |        |
|                     | All Other       | 974 | 0 (Reference)                                   | -              | 1 (Reference)         | -     | -       | -       | -       |         |        |

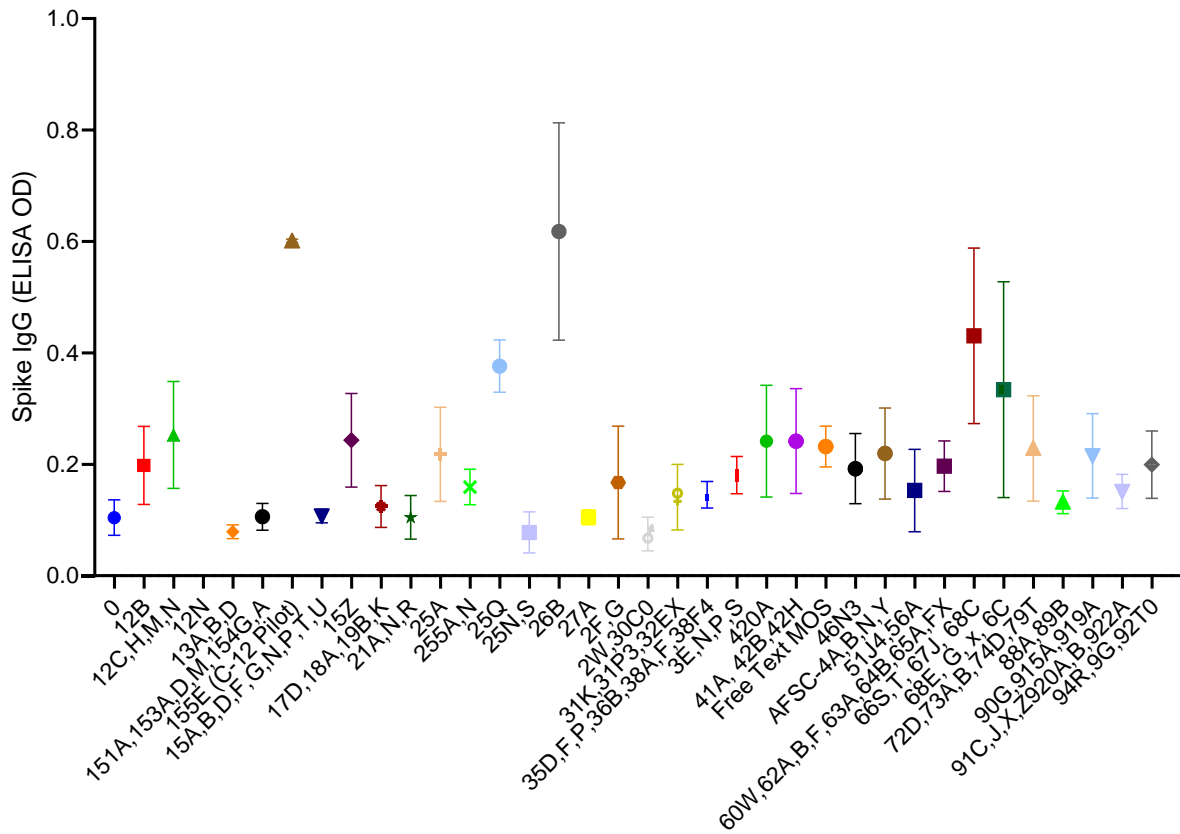

Figure S2. Spike antigen-specific IgG in serum from subjects with different MOS codes. The mean and standard error of spike IgG ELISA OD values are shown for subjects that belong to different MOS groups with  $N \leq 6$  per MOS.
